# Supplementary material for: ATP-Binding Cassette (ABC) Transporter Genes Involved in Pyrethroid Resistance in the Malaria Vector Anopheles sinensis: Genome-Wide Identification, Characteristics, Phylogenetics, and Expression Profile
Source: PubMed Central journal article supplement (PMC6471920; doi:10.3390/ijms20061409), 2019-03-20
Supplement: ijms-20-01409-s001.pdf [file ijms-20-01409-s001.pdf]

## **Supporting information**

**ATP-Binding Cassette (ABC) transporter genes involved in pyrethroid resistance in the malaria vector *Anopheles sinensis*: genome-wide identification, characteristics, phylogenetics and expression profile**

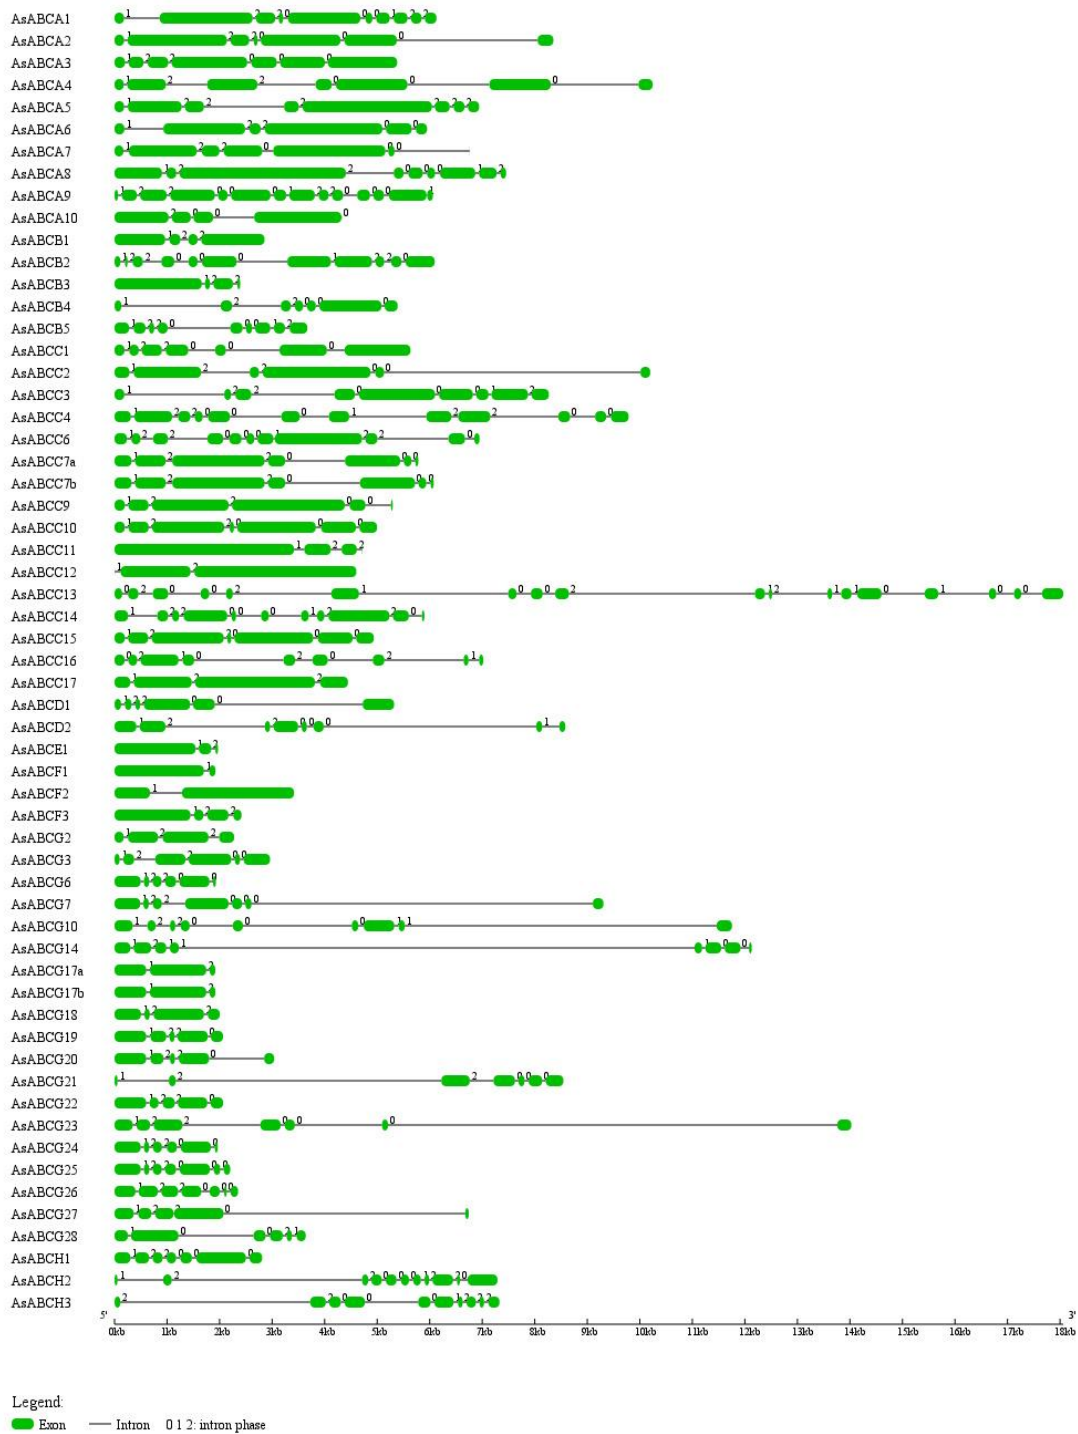

**Supplementary Figure 1.** Gene structure of predicted *An. sinensis* ABC transporter genes. Green boxes represent exons and black lines represent introns. The numbers indicate the splicing phases of the ABC transporter genes: 0 refers to phase 0; 1 to phase 1; and 2 to phase 2.

(A)

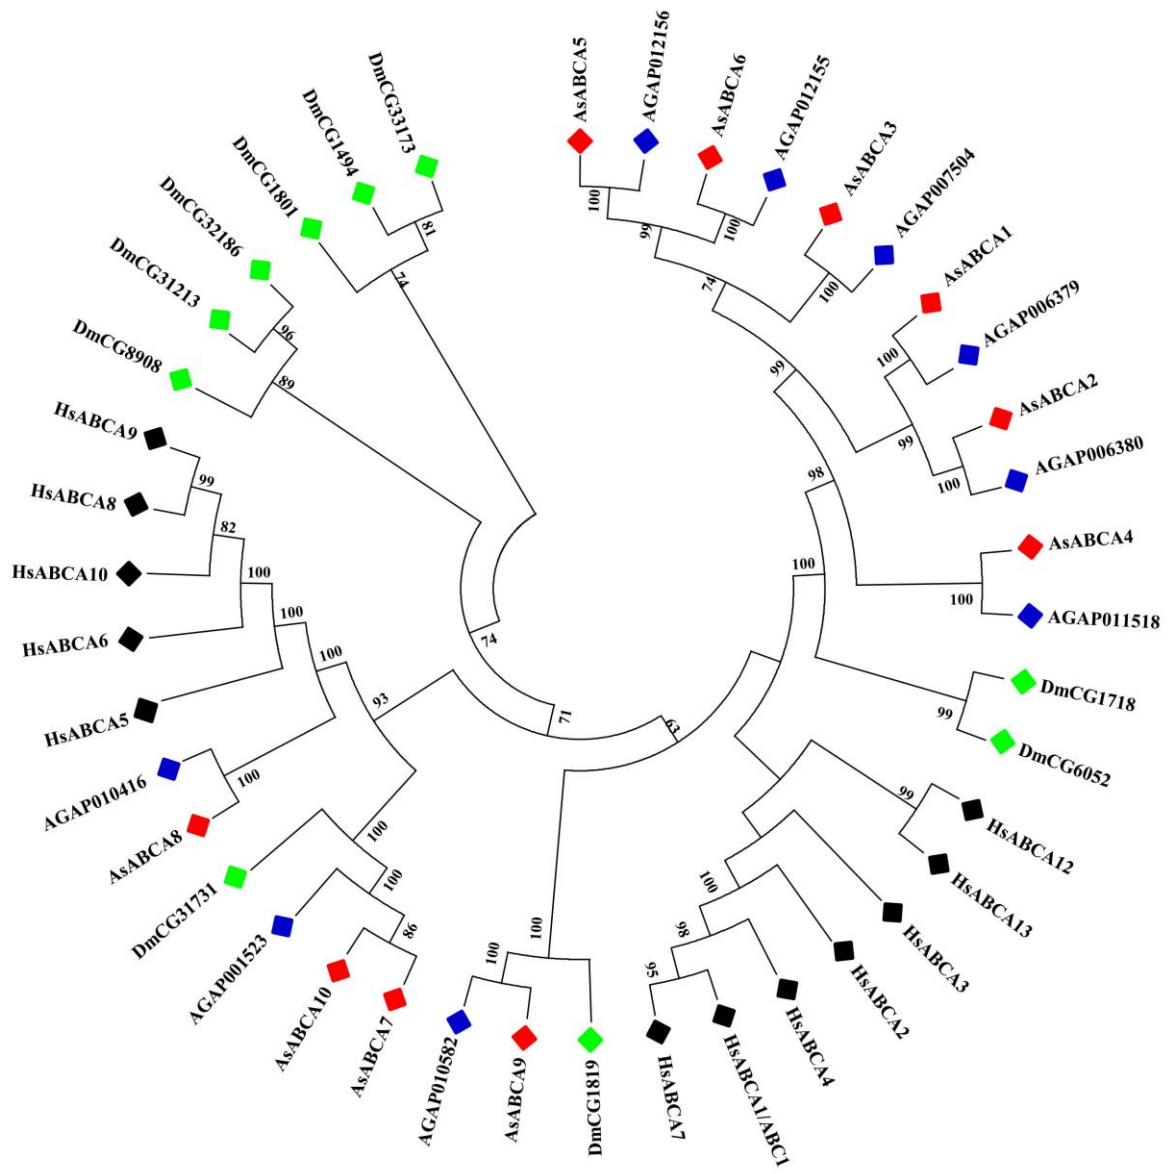

(B)

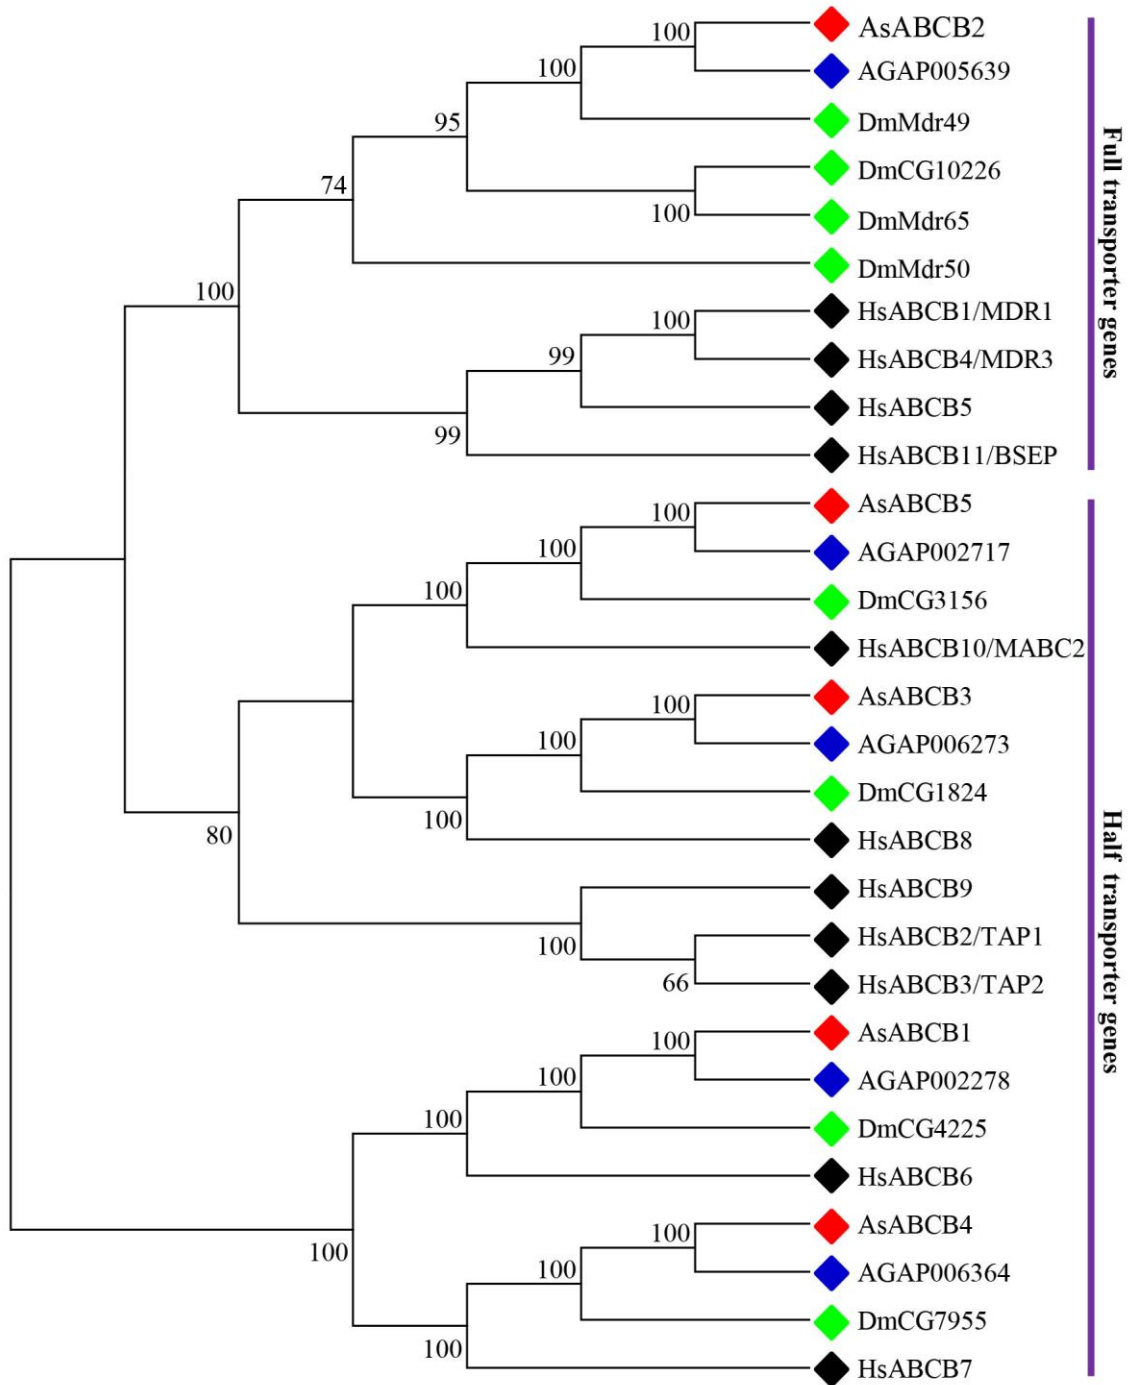

(C)

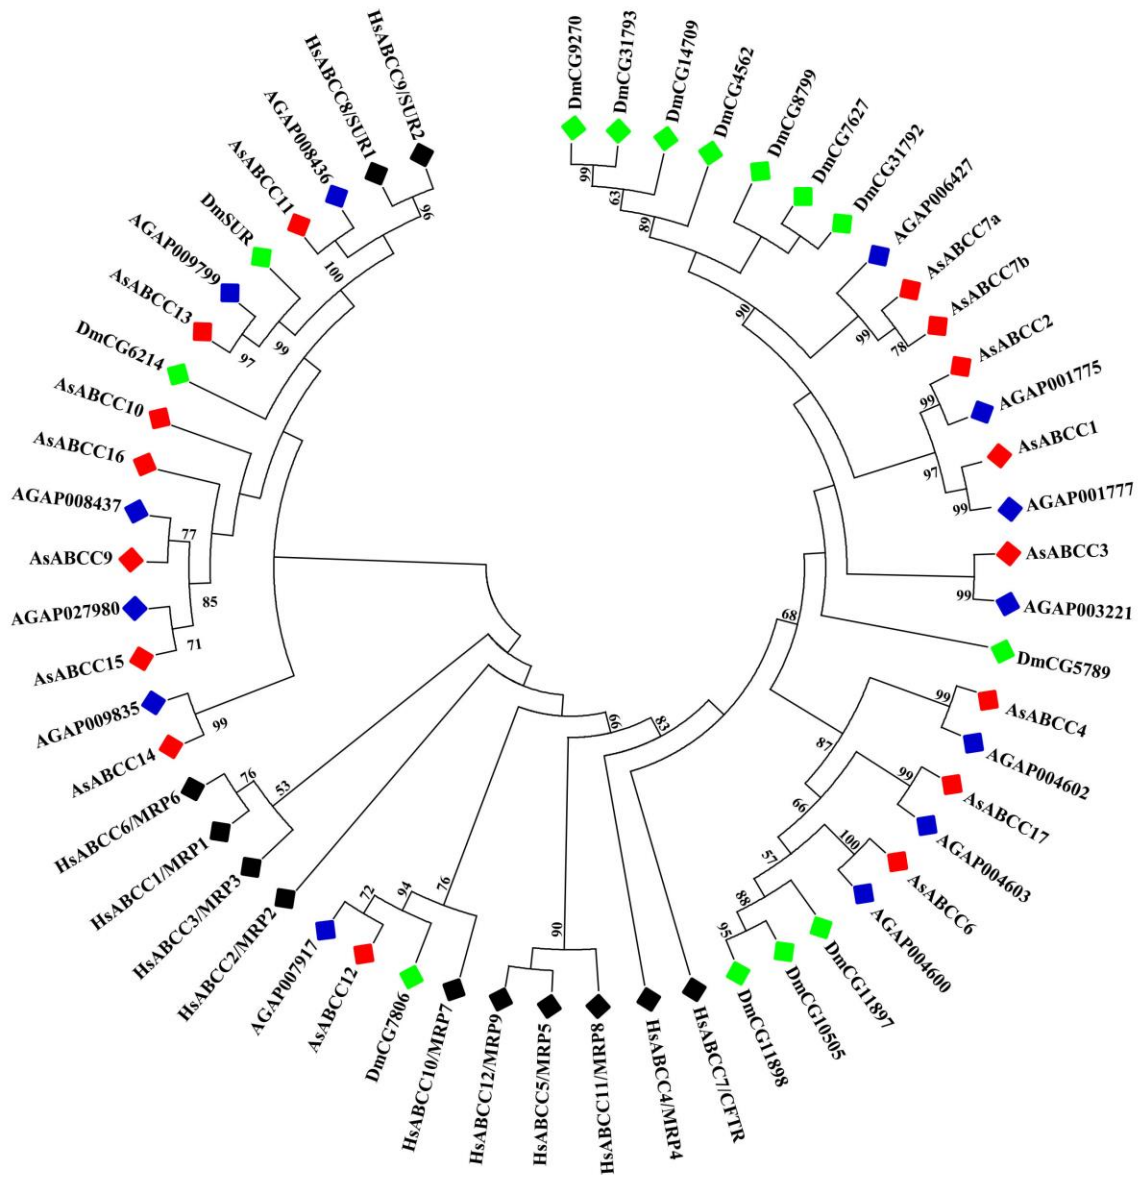

(D)

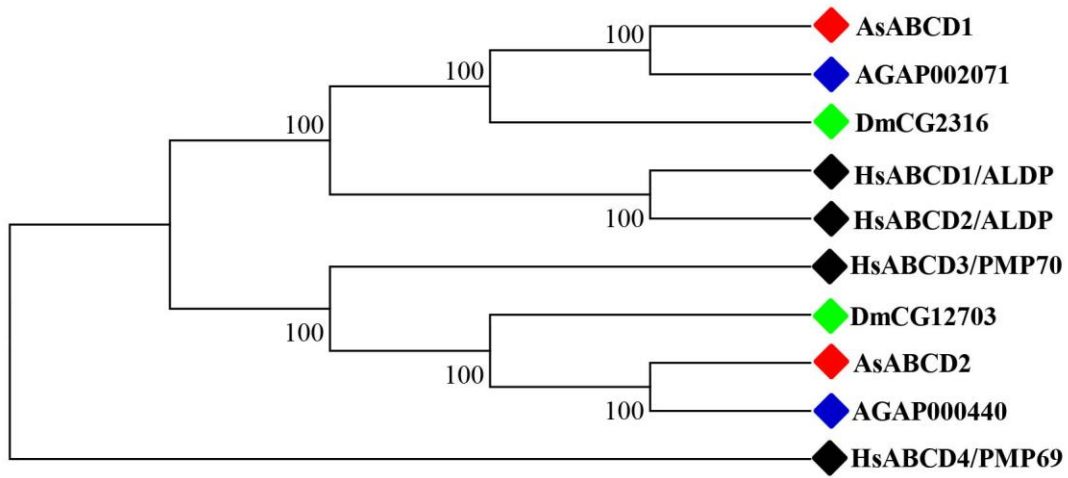

(E)

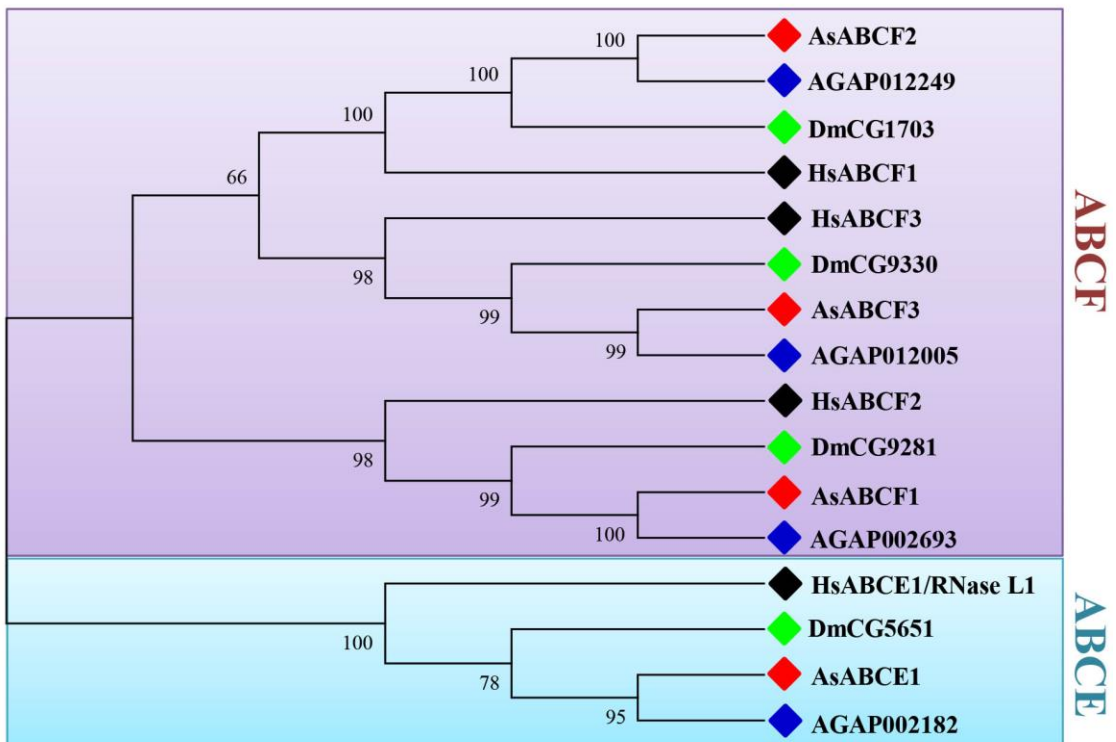



(G)

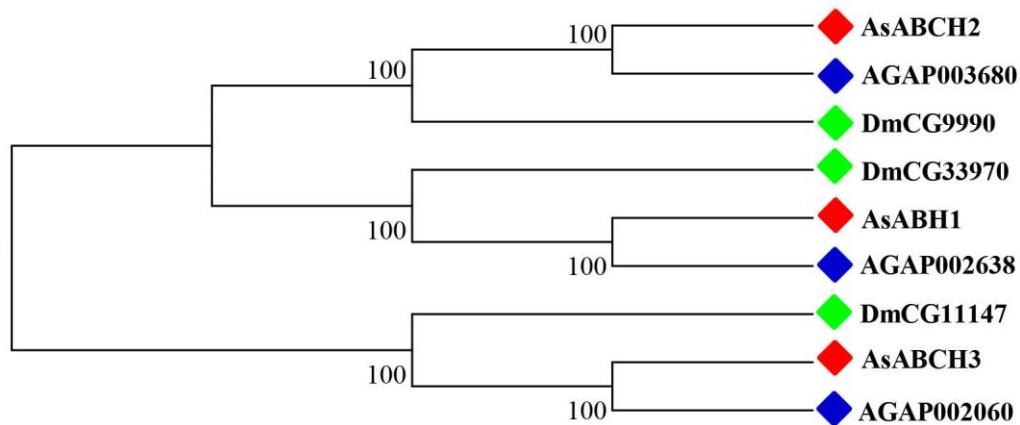

**Supplementary Figure 2.** Phylogenetic relationships of subfamilies of ABC transporter genes of *An. sinensis*, *An. gambiae*, *Dr. melanogaster* and *Ho. sapiens*. (A) ABCA subfamily, (B) ABCB subfamily, (C) ABCC subfamily, (D) ABCD subfamily, (E) ABCE and ABCF subfamilies, (F) ABCG subfamily, and (G) ABCH subfamily. These trees were constructed using the maximum-likelihood method based on predicted amino acid sequences. The program package MEGA5.0 was used for the construction, and the gaps of alignments were deleted with pairwise deletion method. Bootstraps values resulting from 1000 replications are marked on the branches. As, *An. sinensis* (in red); AG, *An. gambiae* (in blue); Dm, *Dr. melanogaster* (in green); Hs, *Ho. sapiens* (in black).



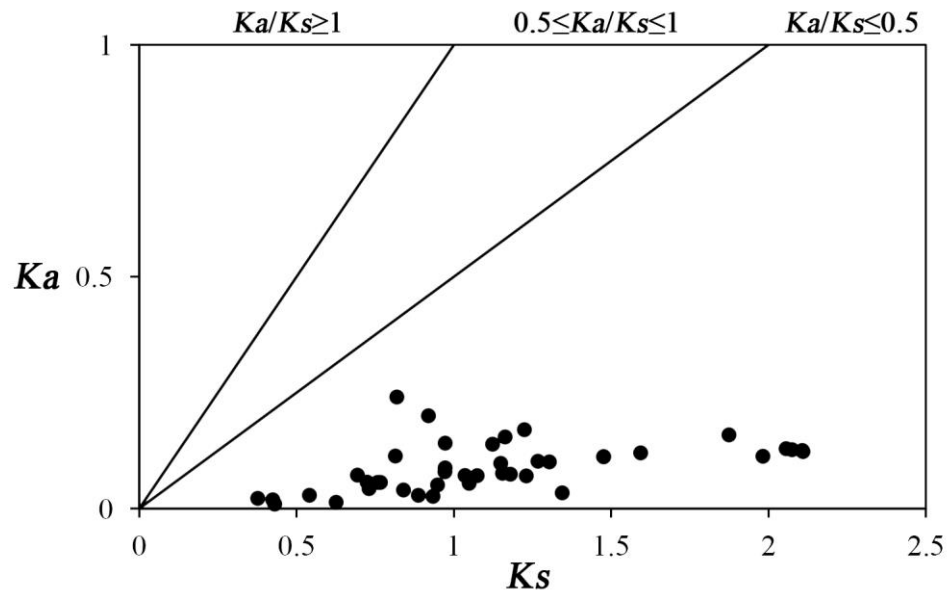

**Supplementary Figure 3.**  $Ka/Ks$  distribution for ABC transporter orthologous genes. The  $Ka/Ks$  ratios of all genes are less than 0.5. These data indicate that all genes experienced purifying selection.

**Supplementary Table S1.** RNA-Seq results of ABC transporter genes of *An. sinensis* in all three field pyrethroid-resistant populations (AH-FR, CQ-FR and YN-FR) in comparison with laboratory susceptible strain (WX-LS). The significantly differentially expressed genes are shown in bold.

| Gene ID            | FPKM of DGE RNA-seq sample |                 |                 |                  | AH-FR vs WX-LS      |               | CQ-FR vs WX-LS      |                | YN-FR vs WX-LS      |                |
|--------------------|----------------------------|-----------------|-----------------|------------------|---------------------|---------------|---------------------|----------------|---------------------|----------------|
|                    | AH-FR                      | CQ-FR           | YN-FR           | WX-LS            | FPKM log2(fold)     | P-value       | FPKM log2(fold)     | P-value        | FPKM log2(fold)     | P-value        |
| ASI10006665        | 13.20415                   | 7.185765        | 9.123355        | 16.778167        | -0.304434235        | 0.6754        | -1.31028202         | 0.0526         | -0.772321648        | 0.37425        |
| ASI10006666        | 44.73765                   | 14.8831         | 33.4433         | 33.081867        | 0.476617138         | 0.52645       | -1.239267261        | 0.0621         | 0.122274036         | 0.896          |
| ASI10001787        | 1.739285                   | 1.21528         | 1.51622         | 1.4437733        | 0.309798195         | 1             | -0.335452497        | 1              | 0.177278398         | 1              |
| ASI10005446        | 0                          | 0.1220655       | 0.309123        | 0.0645504        | -0.092225979        | 1             | 0.832242537         | 1              | 2.3663533           | 1              |
| <b>ASI10011585</b> | <b>13.9094</b>             | <b>1.76993</b>  | <b>5.895405</b> | <b>4.9853833</b> | <b>1.521454229</b>  | <b>0.0435</b> | <b>-1.580904636</b> | <b>0.0463</b>  | <b>0.34850563</b>   | <b>0.67125</b> |
| ASI10011586        | 0.812307                   | 0.296256        | 0.303761        | 0.345195         | 1.275770366         | 1             | -0.307455997        | 1              | -0.077863312        | 1              |
| ASI10017076        | 6.25515                    | 10.3745         | 3.65677         | 4.9432667        | 0.380678241         | 0.59335       | 0.982606253         | 0.1604         | -0.328272305        | 0.69875        |
| ASI10008148        | 0.5634185                  | 0.1771875       | 0.2265925       | 0.222874         | 1.379125478         | 1             | -0.417847742        | 1              | 0.130495354         | 1              |
| ASI10012001        | 10.65735                   | 5.69763         | 12.82535        | 11.113467        | -0.019321926        | 0.97885       | -1.050775396        | 0.116          | 0.313314667         | 0.71985        |
| ASI10008529        | 0                          | 0               | 0.5619525       | 0.7448417        | -0.816984647        | 1             | -0.826506591        | 1              | -0.299852105        | 1              |
| ASI10016633        | 25.97025                   | 19.0789         | 27.86545        | 28.1755          | -0.0764851          | 0.9363        | -0.649360618        | 0.4451         | 0.090667176         | 0.93945        |
| ASI10010010        | 3.177745                   | 2.252           | 2.95841         | 3.2148533        | 0.024405805         | 1             | -0.600462114        | 1              | -0.013322797        | 1              |
| ASI10009929        | 2.574345                   | 4.2492          | 5.594355        | 4.16732          | -0.653760627        | 0.4599        | -0.058810615        | 0.94695        | 0.53147492          | 0.54205        |
| ASI10006641        | 14.2093                    | 20.0868         | 19.07315        | 15.812267        | -0.113054761        | 0.8756        | 0.258309403         | 0.6925         | 0.377116287         | 0.64825        |
| ASI10016463        | 5.415525                   | 6.79192         | 10.9268         | 7.2339733        | -0.376567081        | 0.6274        | -0.177872956        | 0.8189         | 0.701663518         | 0.3914         |
| ASI10014633        | 4.564405                   | 5.228445        | 6.684985        | 6.5224467        | -0.473870629        | 0.5151        | -0.405932394        | 0.56695        | 0.14213707          | 0.85725        |
| ASI10014632        | 14.1126                    | 9.068125        | 13.78205        | 10.27273         | 0.499341551         | 0.4866        | -0.266839609        | 0.6852         | 0.530585237         | 0.53395        |
| ASI10014742        | 3.49632                    | 4.13408         | 8.167355        | 4.2739267        | -0.24852529         | 0.72665       | -0.134900194        | 0.8534         | 1.040924193         | 0.20725        |
| ASI10004082        | 9.27102                    | 4.61573         | 15.84405        | 6.8807           | 0.471300341         | 0.5095        | -0.662901068        | 0.338          | 1.309945926         | 0.12835        |
| ASI10004081        | 0.245234                   | 0.3367445       | 0.428552        | 0.3335867        | -0.402787483        | 1             | -0.07330209         | 1              | 0.468021761         | 1              |
| ASI10001723        | 1.20499                    | 2.246755        | 2.272165        | 1.92673          | -0.635989886        | 1             | 0.134754051         | 1              | 0.344619264         | 1              |
| ASI10002723        | 1.668935                   | 2.85607         | 2.36831         | 1.76999          | -0.043660806        | 1             | 0.603360108         | 1              | 0.526810078         | 1              |
| <b>ASI10007114</b> | <b>6.782115</b>            | <b>1.629245</b> | <b>3.694845</b> | <b>2.2926967</b> | <b>1.605884815</b>  | <b>0.0412</b> | <b>-0.57974186</b>  | <b>1</b>       | <b>0.79507719</b>   | <b>0.34565</b> |
| ASI10007112        | 5.782505                   | 3.365245        | 5.07833         | 4.9585967        | 0.262921549         | 0.71235       | -0.646102104        | 0.37385        | 0.141022345         | 0.8616         |
| <b>ASI10007115</b> | <b>17.675</b>              | <b>11.8014</b>  | <b>18.11215</b> | <b>35.0428</b>   | <b>-0.946275089</b> | <b>0.202</b>  | <b>-1.657033597</b> | <b>0.01455</b> | <b>-0.845542937</b> | <b>0.35055</b> |
| ASI10003245        | 8.84066                    | 8.64466         | 15.3278         | 7.9454167        | 0.195154589         | 0.78205       | 0.034789775         | 0.9576         | 1.054593734         | 0.22035        |
| ASI10001014        | 0.672789                   | 0.297085        | 0.698664        | 1.19318          | -0.785408448        | 1             | -2.092764292        | 1              | -0.665507524        | 1              |
| ASI10009681        | 8.83829                    | 13.98345        | 13.74465        | 7.63816          | 0.25171902          | 0.7197        | 0.785529523         | 0.24555        | 0.954175937         | 0.24835        |
| ASI10007113        | 3.938775                   | 0.600704        | 2.73477         | 2.5773133        | 0.653061131         | 0.39135       | -2.188010726        | 1              | 0.192130106         | 1              |
| ASI10009679        | 13.5209                    | 20.6            | 17.06365        | 12.064067        | 0.205613368         | 0.7779        | 0.685041685         | 0.32855        | 0.606852958         | 0.4563         |
| ASI10004083        | 2.81675                    | 3.2304          | 3.079055        | 2.4246667        | 0.257357306         | 1             | 0.327018069         | 0.6736         | 0.451357026         | 0.59665        |
| ASI10017457        | 16.88395                   | 11.70595        | 20.6265         | 20.5218          | -0.240314587        | 0.73985       | -0.896824095        | 0.18375        | 0.113993527         | 0.8919         |
| ASI10013565        | 23.77695                   | 34.0781         | 37.9187         | 38.280133        | -0.645889332        | 0.39005       | -0.254682166        | 0.71795        | 0.093007554         | 0.9201         |
| ASI10014410        | 233.119                    | 244.553         | 297.687         | 194.81967        | 0.300115932         | 0.67915       | 0.241071737         | 0.69515        | 0.718333406         | 0.46795        |
| ASI10006319        | 203.511                    | 220.1315        | 223.3655        | 223.232          | -0.092232097        | 0.9006        | -0.107114392        | 0.86415        | 0.107532533         | 0.9157         |
| ASI10011705        | 29.5323                    | 36.8468         | 34.4426         | 38.4155          | -0.338140397        | 0.64885       | -0.147099758        | 0.81915        | -0.0508502          | 0.9578         |
| ASI10009140        | 59.53895                   | 60.94865        | 48.3878         | 45.2049          | 0.438557501         | 0.5597        | 0.344185092         | 0.59855        | 0.204839635         | 0.82805        |
| ASI10004617        | 0.805827                   | 1.738645        | 3.86451         | 0.568342         | 0.544878978         | 1             | 1.526272939         | 1              | 2.872029312         | 0.1191         |

|                    |                 |                 |                 |                  |                     |                |                     |                |                    |                |
|--------------------|-----------------|-----------------|-----------------|------------------|---------------------|----------------|---------------------|----------------|--------------------|----------------|
| ASI10008396        | 1.358485        | 2.01803         | 1.41983         | 0.8371747        | 0.739554983         | 1              | 1.182463772         | 1              | 0.868722521        | 1              |
| ASI10005115        | 6.096745        | 5.895285        | 10.8691         | 6.05948          | 0.049984806         | 0.9561         | -0.126518284        | 0.8792         | 0.949542703        | 0.2828         |
| <b>ASI10009696</b> | <b>66.42685</b> | <b>24.79995</b> | <b>66.78665</b> | <b>24.1165</b>   | <b>1.502935216</b>  | <b>0.04395</b> | <b>-0.046587828</b> | <b>0.94175</b> | <b>1.576165527</b> | <b>0.08275</b> |
| ASI10002998        | 9.039075        | 5.13065         | 7.09952         | 11.955           | -0.362173138        | 0.623          | -1.307317478        | 0.1016         | -0.645188126       | 0.43765        |
| ASI10017482        | 7.87822         | 10.329          | 6.28131         | 10.21685         | -0.33382944         | 0.65575        | -0.071138185        | 0.9158         | -0.595184312       | 0.50825        |
| ASI10017484        | 0.5259825       | 0.4903005       | 1.36251         | 0.53955          | 0.004422461         | 1              | -0.224986291        | 1              | 1.443056735        | 1              |
| ASI10002994        | 1.0138205       | 1.119735        | 1.4361          | 2.6098267        | -1.322969044        | 0.28205        | -1.307972215        | 0.30135        | -0.755233012       | 1              |
| ASI10002995        | 0               | 0.109338        | 0.2583355       | 0.1015158        | -0.142516694        | 1              | 0.021924681         | 1              | 1.454265985        | 1              |
| ASI10002993        | 18.92305        | 15.36225        | 21.75775        | 25.789867        | -0.405521731        | 0.5698         | -0.834285934        | 0.2215         | -0.138694247       | 0.86575        |
| ASI10002992        | 2.67197         | 0.3742235       | 2.950265        | 0.5678643        | 2.275433687         | 1              | -0.688494053        | 1              | 2.483799182        | 1              |
| ASI10002991        | 23.28805        | 17.23195        | 19.81475        | 16.811633        | 0.511291793         | 0.4704         | -0.051290945        | 0.93795        | 0.343795706        | 0.6662         |
| ASI10011562        | 5.64435         | 3.356585        | 6.22002         | 5.37822          | 0.110839038         | 0.90455        | -0.767023599        | 0.43035        | 0.316402507        | 0.75685        |
| ASI10002996        | 0               | 0.371788        | 0.1790385       | 0.1912427        | -0.257699808        | 1              | 0.872215054         | 1              | 0.011442146        | 1              |
| <b>ASI10002997</b> | <b>17.21105</b> | <b>6.93384</b>  | <b>19.40685</b> | <b>18.721633</b> | <b>-0.080217499</b> | <b>0.906</b>   | <b>-1.519864962</b> | <b>0.0403</b>  | <b>0.158484706</b> | <b>0.84875</b> |
| ASI10003001        | 38.97295        | 18.4467         | 31.4412         | 35.1735          | 0.189123325         | 0.79305        | -1.018034494        | 0.12675        | -0.055197602       | 0.95075        |
| ASI10005113        | 0.4909205       | 2.171975        | 1.797525        | 1.4500867        | -1.521445454        | 1              | 0.496021258         | 1              | 0.416437962        | 1              |
| ASI10005114        | 0.829031        | 1.441           | 1.078395        | 0.398728         | 1.097177091         | 1              | 1.766713151         | 1              | 1.541951183        | 1              |
| ASI10003266        | 62.2466         | 24.5125         | 57.45905        | 50.275767        | 0.349259123         | 0.63615        | -1.123233086        | 0.0887         | 0.299315214        | 0.74135        |
| ASI10014141        | 4.159905        | 10.051835       | 9.74226         | 4.3467667        | -0.022223043        | 0.94875        | 1.122510935         | 0.24445        | 1.270998919        | 0.23105        |
| <b>ASI10015886</b> | <b>13.7664</b>  | <b>19.62915</b> | <b>25.34355</b> | <b>5.1081633</b> | <b>1.471400339</b>  | <b>0.04955</b> | <b>1.855211475</b>  | <b>0.0092</b>  | <b>2.417370711</b> | <b>0.00775</b> |
| ASI10006388        | 7.711095        | 2.918995        | 9.22602         | 5.5424767        | 0.517610882         | 0.47045        | -1.011939717        | 0.19915        | 0.841775598        | 0.2983         |
| ASI10003817        | 6.10794         | 1.0032175       | 4.065725        | 2.69066          | 1.223897896         | 0.1586         | -1.510233854        | 1              | 0.702189007        | 0.4627         |
| ASI10017471        | 0.3670665       | 0.244019        | 0.507556        | 1.3428           | -1.829937261        | 1              | -2.547087646        | 1              | -1.296979253       | 1              |

**Supplementary Table 2.** Accession numbers of ABC transporter genes from *An. gambiae*, *Dr. melanogaster* and *Ho. sapiens*

| Genes      | Accession no.  | Genes     | Accession no.  | Genes            | Accession no.  |
|------------|----------------|-----------|----------------|------------------|----------------|
| AGAP000440 | XP_310656.2    | DmAter    | NP_523471.2    | HsABCA1/ABC1     | NP_005493.2    |
| AGAP000506 | XP_310585.4    | DmBrown   | NP_523824.1    | HsABCA10         | NP_525021.3    |
| AGAP000553 | XP_310530.3    | DmCG10226 | NP_648040.1    | HsABCA12         | NP_056472.2    |
| AGAP001333 | XP_321812.4    | DmCG10505 | NP_611571.2    | HsABCA13         | NP_689914.3    |
| AGAP001523 | XP_321601.5    | DmCG11069 | NP_651307.2    | HsABCA2          | NP_001597.2    |
| AGAP001775 | XP_551022.4    | DmCG11147 | NP_608954.1    | HsABCA3          | NP_001080.2    |
| AGAP001777 | XP_321300.4    | DmCG11897 | NP_651678.1    | HsABCA4          | AAK05632.1     |
| AGAP001858 | XP_321211.4    | DmCG11898 | NP_651679.2    | HsABCA5          | NP_061142.2    |
| AGAP002050 | XP_320998.5    | DmCG12703 | NP_608354.1    | HsABCA6          | NP_525023.2    |
| AGAP002051 | XP_320996.5    | DmCG14709 | NP_650086.2    | HsABCA7          | AAK00959.1     |
| AGAP002060 | XP_320987.5    | DmCG1494  | NP_608444.2    | HsABCA8          | NP_009099.1    |
| AGAP002071 | XP_320975.4    | DmCG1703  | NP_572736.1    | HsABCA9          | NP_525022.2    |
| AGAP002182 | XP_308004.3    | DmCG1718  | NP_608445.2    | HsABCB1/MDR1     | NP_001335874.1 |
| AGAP002278 | XP_307900.5    | DmCG17646 | NP_608618.1    | HsABCB10/MABC2   | NP_036221.2    |
| AGAP002638 | XP_312290.4    | DmCG1801  | NP_728408.3    | HsABCB11/BSEP    | XP_016860654.1 |
| AGAP002693 | XP_312228.5    | DmCG1819  | NP_001138224.1 | HsABCB2/TAP1     | NP_000584.2    |
| AGAP002717 | XP_312209.4    | DmCG1824  | NP_572810.1    | HsABCB3/TAP2     | AAA59841.1     |
| AGAP003221 | XP_312930.5    | DmCG2316  | NP_651906.1    | HsABCB4/MDR3     | NP_000434.1    |
| AGAP003680 | XP_313462.4    | DmCG31121 | NP_733058.1    | HsABCB5          | AAP55848.1     |
| AGAP004600 | XP_001237640.2 | DmCG31213 | NP_001262752.1 | HsABCB6          | NP_005680.1    |
| AGAP004602 | XP_001688623.2 | DmCG3156  | NP_569844.2    | HsABCB7          | NP_001258625.1 |
| AGAP004603 | XP_315221.5    | DmCG3164  | NP_608494.2    | HsABCB8          | NP_001269220.1 |
| AGAP005639 | XP_315658.3    | DmCG31689 | NP_722827.1    | HsABCB9          | NP_062571.1    |
| AGAP006273 | XP_316337.4    | DmCG31731 | NP_001036360.1 | HsABCC1/MRP1     | AAB46616.1     |
| AGAP006364 | XP_316391.4    | DmCG31792 | NP_724148.2    | HsABCC10/MRP7    | NP_258261.2    |
| AGAP006379 | XP_557048.3    | DmCG31793 | NP_609930.4    | HsABCC11/MRP8    | NP_149163.2    |
| AGAP006380 | XP_001688862.1 | DmCG32091 | NP_729728.1    | HsABCC12/MRP9    | NP_150229.2    |
| AGAP006427 | XP_316463.3    | DmCG32186 | NP_730301.3    | HsABCC2/MRP2     | AAB39892.1     |
| AGAP007504 | XP_308371.4    | DmCG33173 | NP_788912.2    | HsABCC3/MRP3     | NP_003777.2    |
| AGAP007655 | XP_308215.4    | DmCG3327  | NP_995622.1    | HsABCC4/MRP4     | NP_005836.2    |
| AGAP007917 | XP_317569.4    | DmCG33970 | NP_01034071.1  | HsABCC5/MRP5     | AAD37716.1     |
| AGAP008436 | XP_317007.3    | DmCG4225  | NP_650503.1    | HsABCC6/MRP6     | O95255.2       |
| AGAP008437 | KFB39079.1     | DmCG4562  | NP_001262747.1 | HsABCC7/CFTR     | AAC13657.1     |
| AGAP008889 | XP_319635.4    | DmCG4619  | NP_609329.3    | HsABCC8/SUR1     | AAB02278.1     |
| AGAP008945 | KFB35656.1     | DmCG4822  | NP_722602.1    | HsABCC9/SUR2     | NP_005682.2    |
| AGAP009463 | XP_310233.4    | DmCG5651  | NP_648272.1    | HsABCD1/ALDP     | CAA79922.1     |
| AGAP009464 | XP_310232.4    | DmCG5789  | NP_651269.1    | HsABCD2/ALDP     | NP_005155.1    |
| AGAP009468 | XP_001688274.1 | DmCG6052  | NP_649002.2    | HsABCD3/PMP70    | CAA41416.1     |
| AGAP009469 | XP_001688273.1 | DmCG6214  | NP_723772.2    | HsABCD4/PMP69    | NP_005041.1    |
| AGAP009471 | XP_310228.4    | DmCG7627  | NP_609215.3    | HsABCE1/RNase L1 | CAA53972.1     |
| AGAP009472 | XP_001688272.1 | DmCG7806  | NP_609207.1    | HsABCF1          | AAH34488.1     |

|            |             |           |             |                |             |
|------------|-------------|-----------|-------------|----------------|-------------|
| AGAP009799 | XP_553659.3 | DmCG7955  | NP_728642.2 | HsABCF2        | NP_005683.2 |
| AGAP009835 | XP_553715.3 | DmCG8799  | NP_610482.3 | HsABCF3        | NP_060828.2 |
| AGAP009850 | XP_318963.3 | DmCG8908  | NP_611464.3 | HsABCG1/WHITE1 | NP_004906.3 |
| AGAP010416 | XP_311532.4 | DmCG9270  | AFI71925.1  | HsABCG2/BCRP   | NP_004818.2 |
| AGAP010582 | XP_314549.4 | DmCG9281  | NP_573057.1 | HsABCG4/WHITE2 | NP_071452.2 |
| AGAP011518 | ETN65103.1  | DmCG9330  | NP_649129.1 | HsABCG5        | NP_071881.1 |
| AGAP012005 | XP_320530.4 | DmCG9663  | NP_608760.2 | HsABCG8        | AAI13658.1  |
| AGAP012155 | XP_320377.4 | DmCG9664  | NP_722889.1 |                |             |
| AGAP012156 | XP_552044.3 | DmCG9990  | NP_651628.1 |                |             |
| AGAP012249 | XP_320293.4 | DmMdr49   | NP_523724.2 |                |             |
| AGAP027980 | ETN62869.1  | DmMdr50   | NP_523740.3 |                |             |
|            |             | DmMdr65   | NP_476831.1 |                |             |
|            |             | DmScarlet | NP_524108.1 |                |             |
|            |             | DmSUR     | Q9VL32.4    |                |             |
|            |             | DmWhite   | NP_476787.1 |                |             |

---
